# Supplementary material
Source: publisher site journal article supplement (https://static.cambridge.org/content/id/urn:cambridge.org:id:article:S0714980820000306/resource/name/S0714980820000306supp001.docx)
Supplement: Supplementary file 1 [file S0714980820000306supp001.docx]

**Appendix A. Semi-Structured Interview Guide**

*Round 1:*

- What is your opinion on using alcohol?
- What are some of your motivations or reasons?
- Have your opinions changed over time?
- If you don’t use alcohol, what’s your opinion on alcohol use?
- Did you ever drink?
- If so, why did this change?

*Round 2:*

- Where do you think older adults feel comfortable talking about alcohol use and low-risk drinking guidelines?
- What is your opinion about being screened for alcohol use?
- How would you feel if it was in a clinical setting (e.g. with GP, at a hospital)?
- How would you feel if it was at a community centre?
- Are there certain times in life when it is more appropriate to ask people about their alcohol use, for example, following retirement or the death of a spouse?
- What are some other life events when it would be appropriate to ask people about their alcohol use?
- At these times, who would be the best person to discuss alcohol use with?

*Round 3:*

- In your opinion, do we need a separate set of Low-Risk Drinking Guidelines specific to older adults?
  - Why or why not?
- Is it discriminatory or ageist?
- Do these guidelines seem relevant to you/your family/your friends?
  - Why or why not?
- Is there anything missing?
- Is there anything that seems out of place?
- Are these guidelines fair?
- Is 65 the right age to use?
- Is it fair to differ between males and females in this way?

*Round 4:*

- How would you like to see these Low-Risk Drinking Guidelines shared with others?
- Who needs to know about these?
- Who should we target and how do we go about targeting different groups?
- Where should these guidelines be displayed?
- Can you think of any suggestions for media or outreach?
- How can we promote these Low-Risk Drinking Guidelines in your community?
- What are some of the benefits for older adults in your community?
- What is your opinion on this issue?
